# Supplementary material for: Proteasome Dysfunction Mediates Obesity-Induced Endoplasmic Reticulum Stress and Insulin Resistance in the Liver
Source: PubMed Central journal article supplement — Diabetes. 2013 Feb 14;62(3):811–24. doi: 10.2337/db11-1652 (PMC3581221; doi:10.2337/db11-1652), 2013-02-14

SUPPLEMENTARY DATA

**Supplementary Table 1.** Clinical characteristics of study subjects for DNA chip analyses.

|                          | Non-obese diabetes | Obese diabetes |
|--------------------------|--------------------|----------------|
| No. (M:F)                | 11 (8:3)           | 10 (7:3)       |
| Age (yr)                 | 56±5               | 50±13          |
| BMI (kg/m <sup>2</sup> ) | 21.7±1.4           | 27.4±3.8*      |
| FPG (mg/dl)              | 153±60             | 132±32         |
| HbA1c (%)                | 8.1±1.8            | 7.3±1.3        |
| HOMA-R                   | 1.75±0.69          | 3.78±2.94      |
| MCR (mg/kg/min)          | 6.76±5.6           | 4.51±2.11      |
| TC (mg/dl)               | 200±41             | 199±20         |
| Triglyceride (mg/dl)     | 118±95             | 144±60         |
| HDL-C (mg/dl)            | 48±14              | 45±9           |
| AST (IU/L)               | 21±4               | 30±14          |
| ALT (IU/L)               | 23±6               | 47±32 **       |

**Supplementary Table 2.** Clinical characteristics of the subjects (N=24) for realtime RT-PCR analyses.

|                          |           |
|--------------------------|-----------|
| Male : Female            | 14:10     |
| Age (yr)                 | 50±3      |
| BMI (kg/m <sup>2</sup> ) | 27.1±1.2  |
| FPG (mg/dl)              | 132±8     |
| HbA1c (%)                | 7.8±1.6   |
| HOMA-R                   | 3.42±2.54 |

SUPPLEMENTARY DATA

**Supplementary Table 3.** mRNA expression of genes involved in protein degradation in the livers of mice fed the high fat diet.

| Gene name  |                                        | Alilent ID  | HFD vs. STD |
|------------|----------------------------------------|-------------|-------------|
| Psme1      | proteasome 28 subunit, alpha           | NM_011189.1 | 1.04        |
| Psme2      | proteasome 28 subunit, beta            | NM_011190.3 | *1.24       |
| Psme3      | proteasome 28 subunit, 3               | NM_011192.3 | 1.05        |
| Psma1      | proteasome subunit, alpha type 1       | NM_011965.1 | 1.04        |
| Psma3      | proteasome subunit, alpha type 3       | NM_011184.2 | 1.01        |
| Psma5      | proteasome subunit, alpha type 5       | NM_011967.2 | 0.99        |
| Psmb1      | proteasome subunit, beta type 1        | NM_011185.2 | 1.11        |
| Psmb2      | proteasome subunit, beta type 2        | NM_011970.2 | 1.09        |
| Psmb5      | proteasome subunit, beta type 5        | NM_011186.1 | 1.19        |
| Psmc1      | proteasome 26S subunit, non-ATPase, 1  | NM_027357.1 | 1.06        |
| Psmc2      | proteasome 26S subunit, non-ATPase, 2  | NM_134101.1 | 1.22        |
| Psmc14     | proteasome 26S subunit, non-ATPase, 14 | NM_021526.1 | 1.07        |
| Dscr2      | proteasome assembling protein 1 (PAC1) | NM_019537.1 | 1.02        |
| Tnfrsf5ip1 | proteasome assembling protein 1 (PAC2) | NM_134138.1 | 1.12        |
| Ubc        | ubiquitin                              | NM_019639.3 | 1.14        |

Transcript levels for genes involved in protein degradation were determined using custom-made, high-precision DNA chips (Ando et al., 2009). Data represent the mean  $\pm$ SEM of four mice and are expressed relative to the mice fed a standard diet for each gene (n=4-5). STD, standard chow diet, HFD, high-fat diet. \*P<0.05.

SUPPLEMENTARY DATA

**Supplementary Figure 1.** Blood levels of glucose and plasma levels of insulin during intraperitoneal glucose tolerant test (n = 6–10). Mice were fasted for 12 h, followed by a glucose injection (1.5 g/kg i.p.). Blood levels of glucose and plasma levels of insulin were measured before and after glucose infusion. \*P < 0.05 and \*\*P < 0.01 vs. PBA-untreated PA28 KO mice by ANOVA.

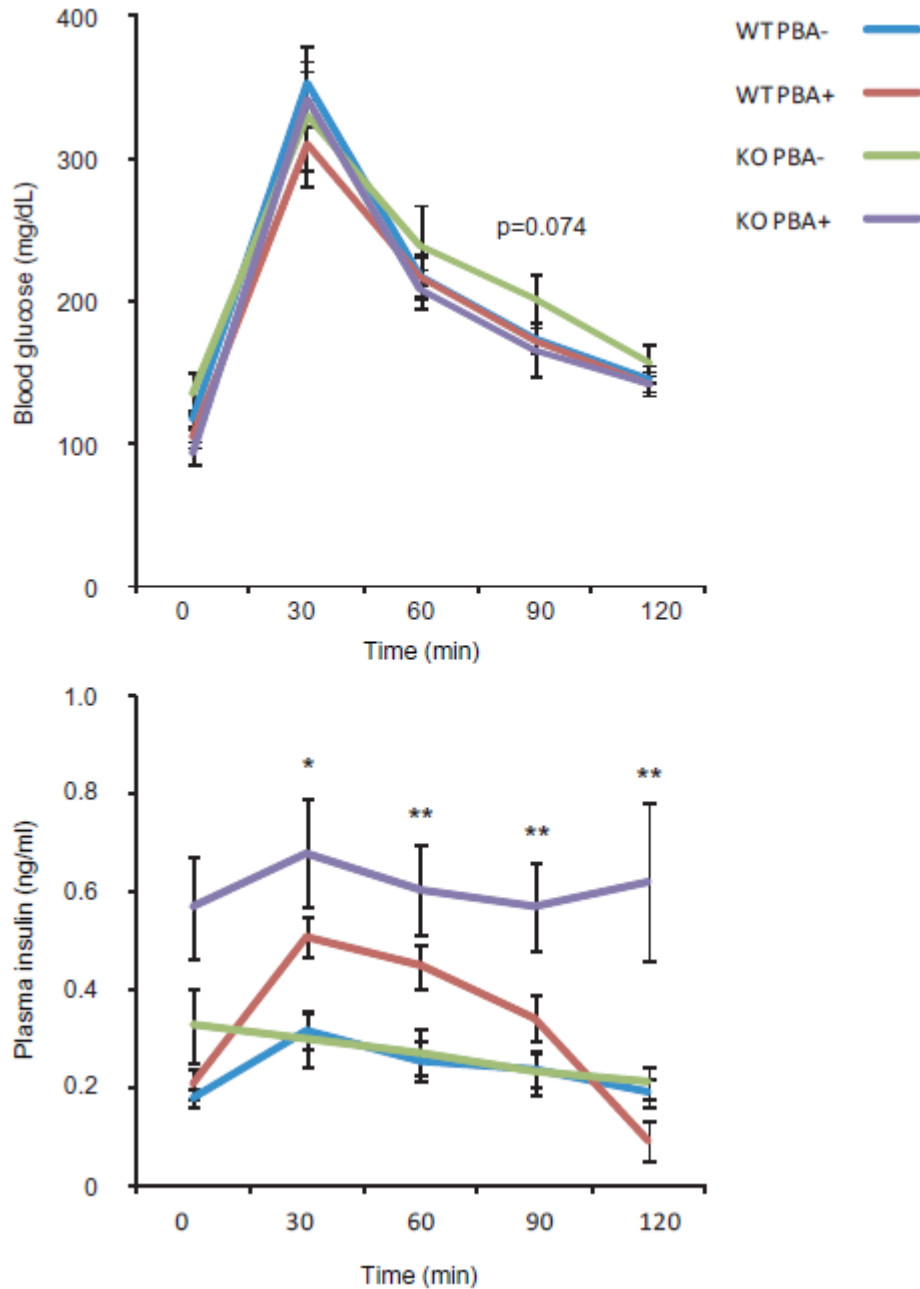

SUPPLEMENTARY DATA

**Supplementary Figure 2.** Model highlighting the metabolic pathways to hepatic glucose overproduction caused by proteasome dysfunction in the liver. Obesity and ingestion of a high-fat diet cause proteasome dysfunction that accumulates ubiquitinated proteins and causes ER stress, JNK activation, and insulin resistance in the liver. ER stress and proteasome dysfunction contributes to the development of hepatic steatosis via activating SREBP-1c. Proteasome dysfunction, directly and via insulin resistance, increases total and nuclear FoxO1 that enhances hepatic gluconeogenesis.

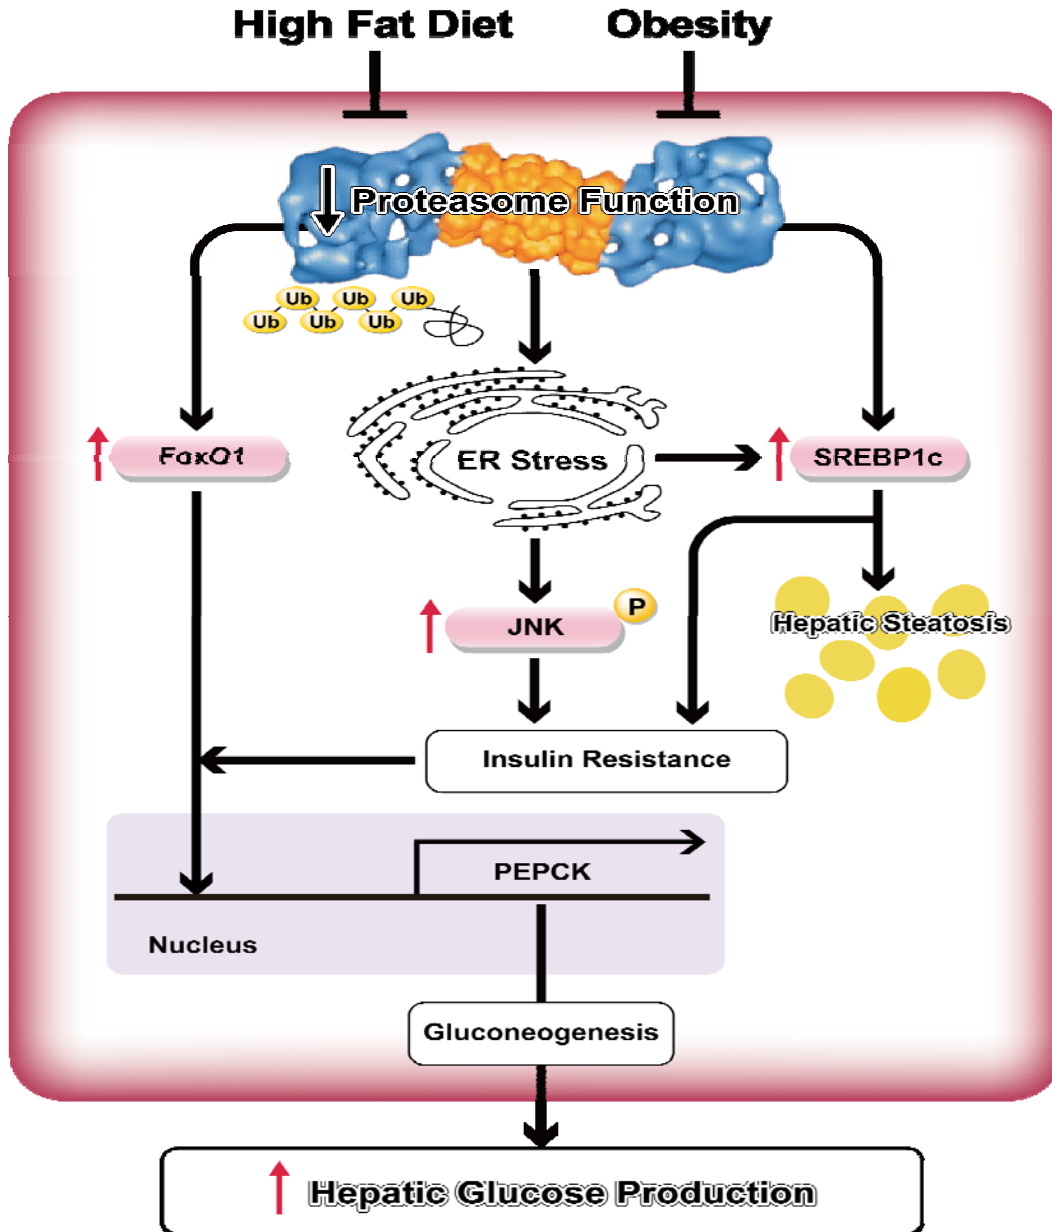

Supplement: supp_db11-1652_DB111652SupplementaryData.pdf [file supp_db11-1652_DB111652SupplementaryData.pdf]
